# Supplementary material
Source: PubMed Central journal article supplement (PMC7309322)
Supplement: ct9b01104_si_001.pdf [file ct9b01104_si_001.pdf]

# Could Microwave Irradiation Cause Misfolding of Peptides? - Supporting Material

Martin Gladovic,<sup>†</sup> Chris Oostenbrink,<sup>‡</sup> and Urban Bren<sup>\*,†,¶</sup>

<sup>†</sup>*Faculty of Chemistry and Chemical Technology, University of Maribor, Smetanova 17,  
SI-2000 Maribor, Slovenia*

<sup>‡</sup>*Institute of Molecular Modeling and Simulation, University of Natural Resources and Life  
Sciences, Muthgasse 18, 1190 Vienna, Austria*

<sup>¶</sup>*National Institute of Chemistry, Hajdrihova 19, SI-1000 Ljubljana, Slovenia*

E-mail: urban.bren@um.si

Phone: +386 2 2294 421

## Figures

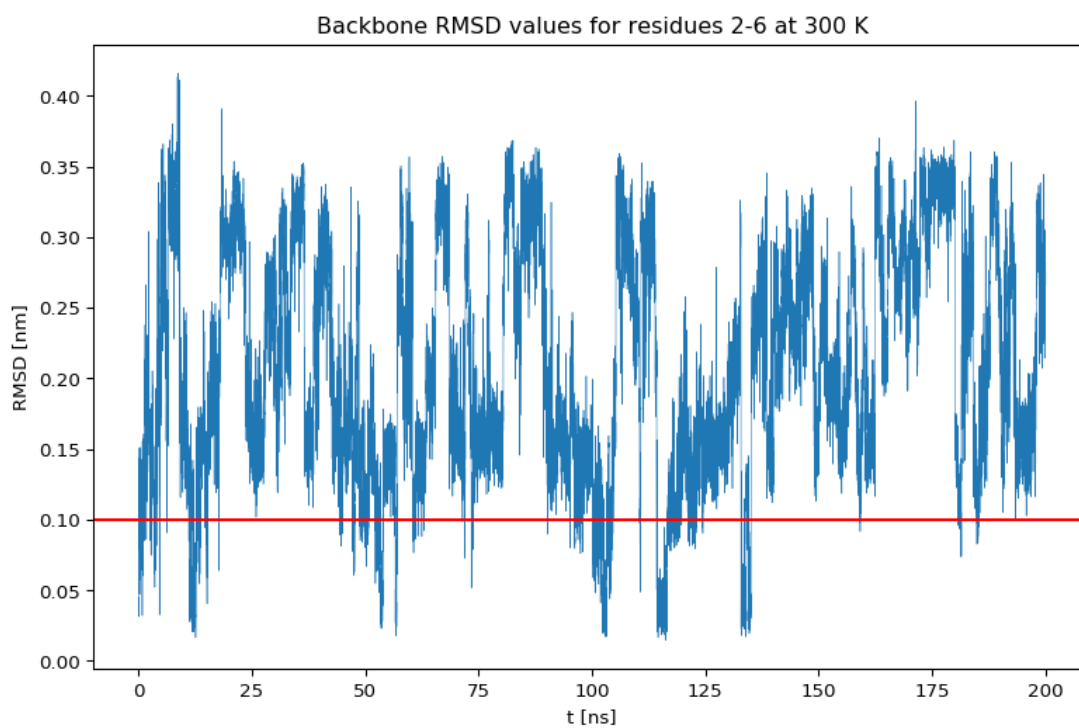

Figure S1: Backbone atom-positional RMSD values plot as a function of time for the simulation at 300 K. The 0.1 nm cutoff RMSD value between the folded and unfolded structures is depicted with a red line.

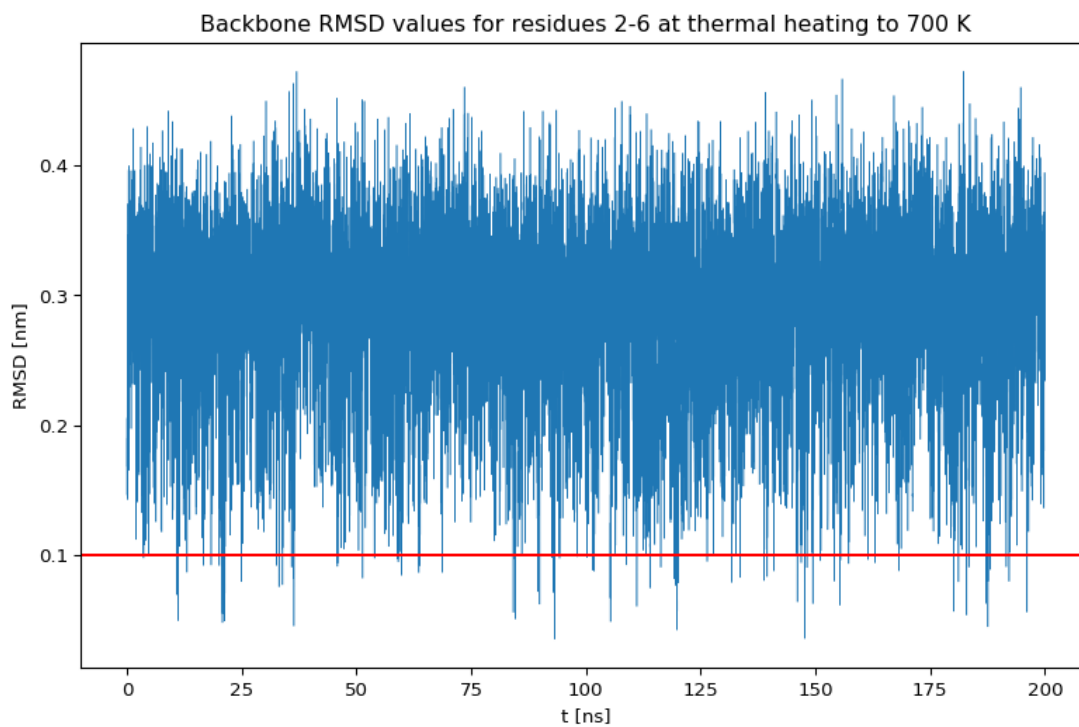

Figure S2: Backbone atom-positional RMSD values plot as a function of time for the simulation of thermal heating to 700 K. The 0.1 nm cutoff RMSD value between the folded and unfolded structures is depicted with a red line.

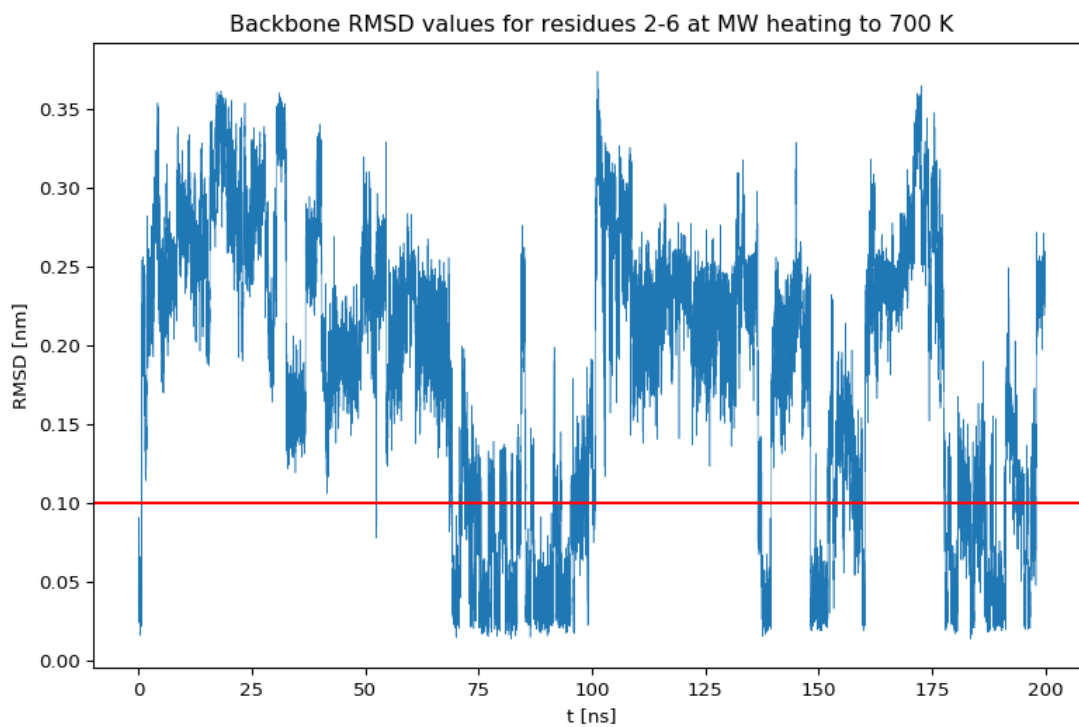

Figure S3: Backbone atom-positional RMSD values plot as a function of time for the simulation of MW heating to 700 K. The 0.1 nm cutoff RMSD value between the folded and unfolded structures is depicted with a red line.

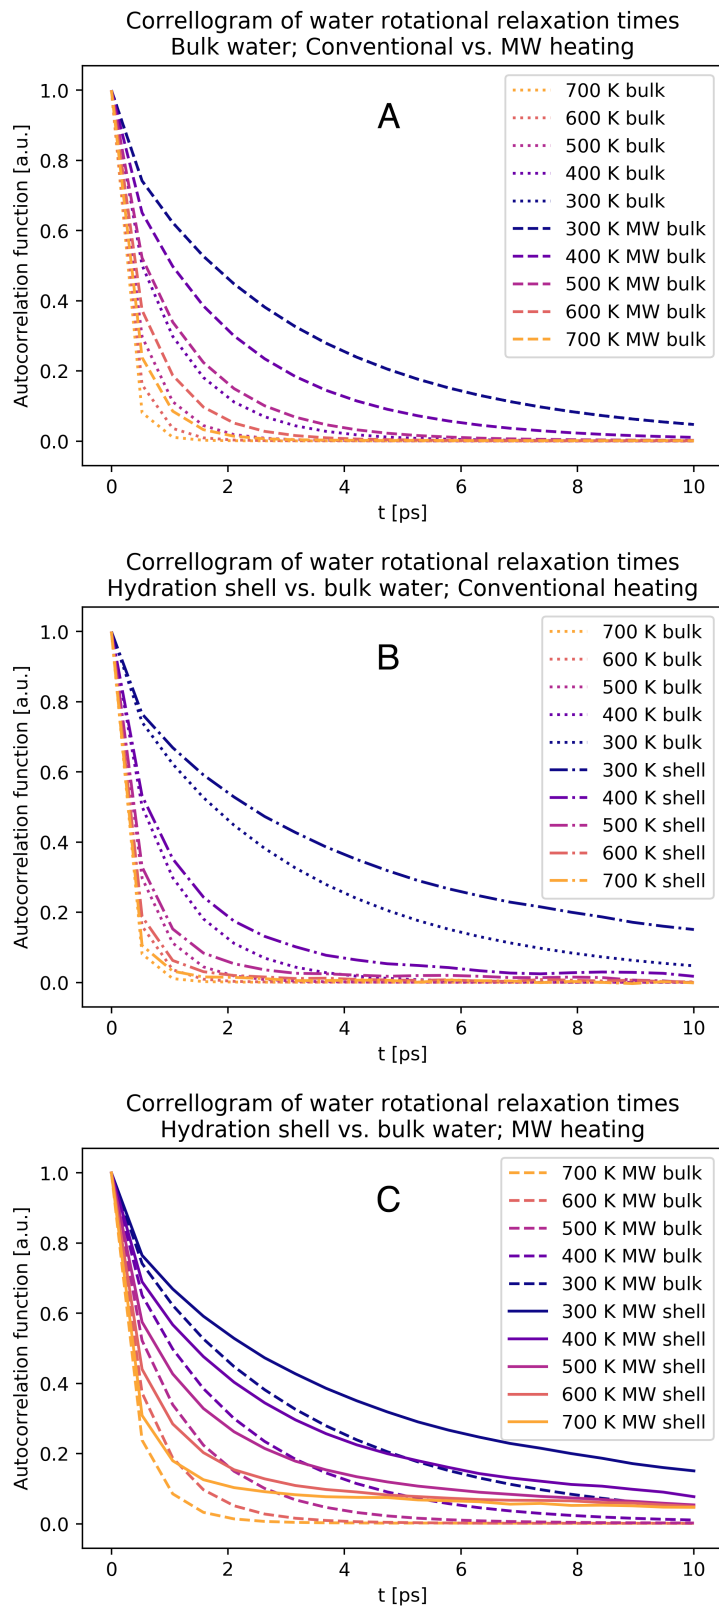

Figure S4: Correlograms of the rotational relaxation times of water molecules. The autocorrelation functions were calculated using the first-order Legendre polynomial of molecular axis aligned with the water molecule's dipole vector<sup>1</sup>. A (top): Comparison of the bulk solvent using conventional heating and microwave heating. B (middle): Comparison of the hydration shell and the bulk solvent using conventional heating. C (bottom): Comparison of the hydration shell and the bulk solvent using MW heating.

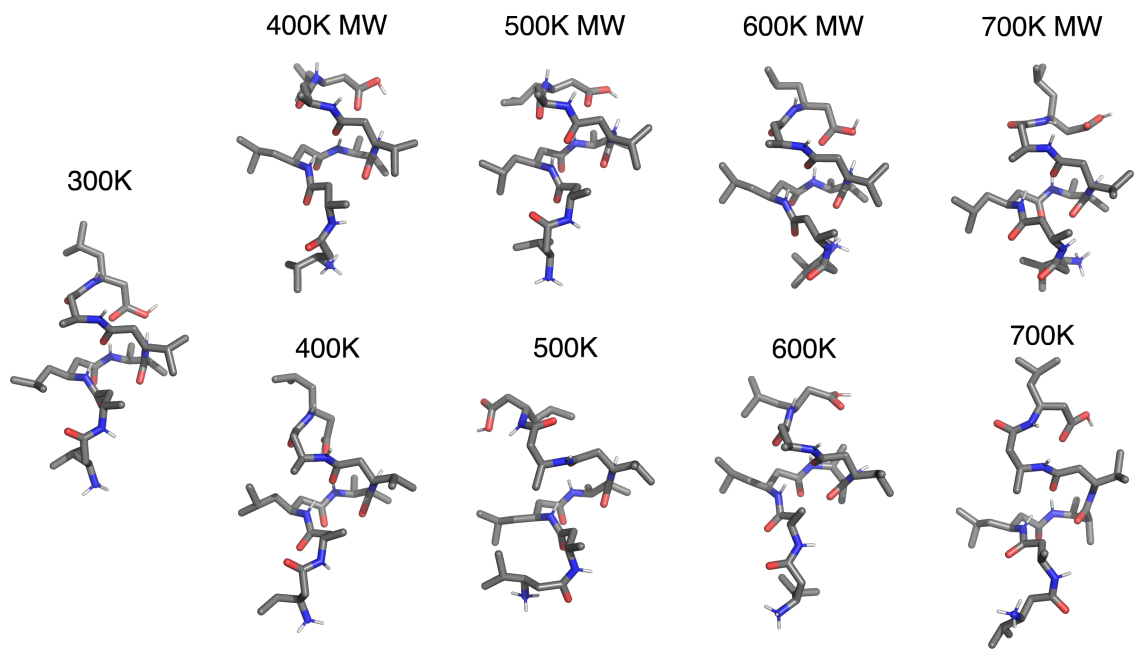

Figure S5: Central member structures of the most stable cluster for each simulation. The temperature labels 300 K – 700 K denote the systems at equilibrium temperature while the labels 400 K MW – 700 K MW denote rotationally heated systems.

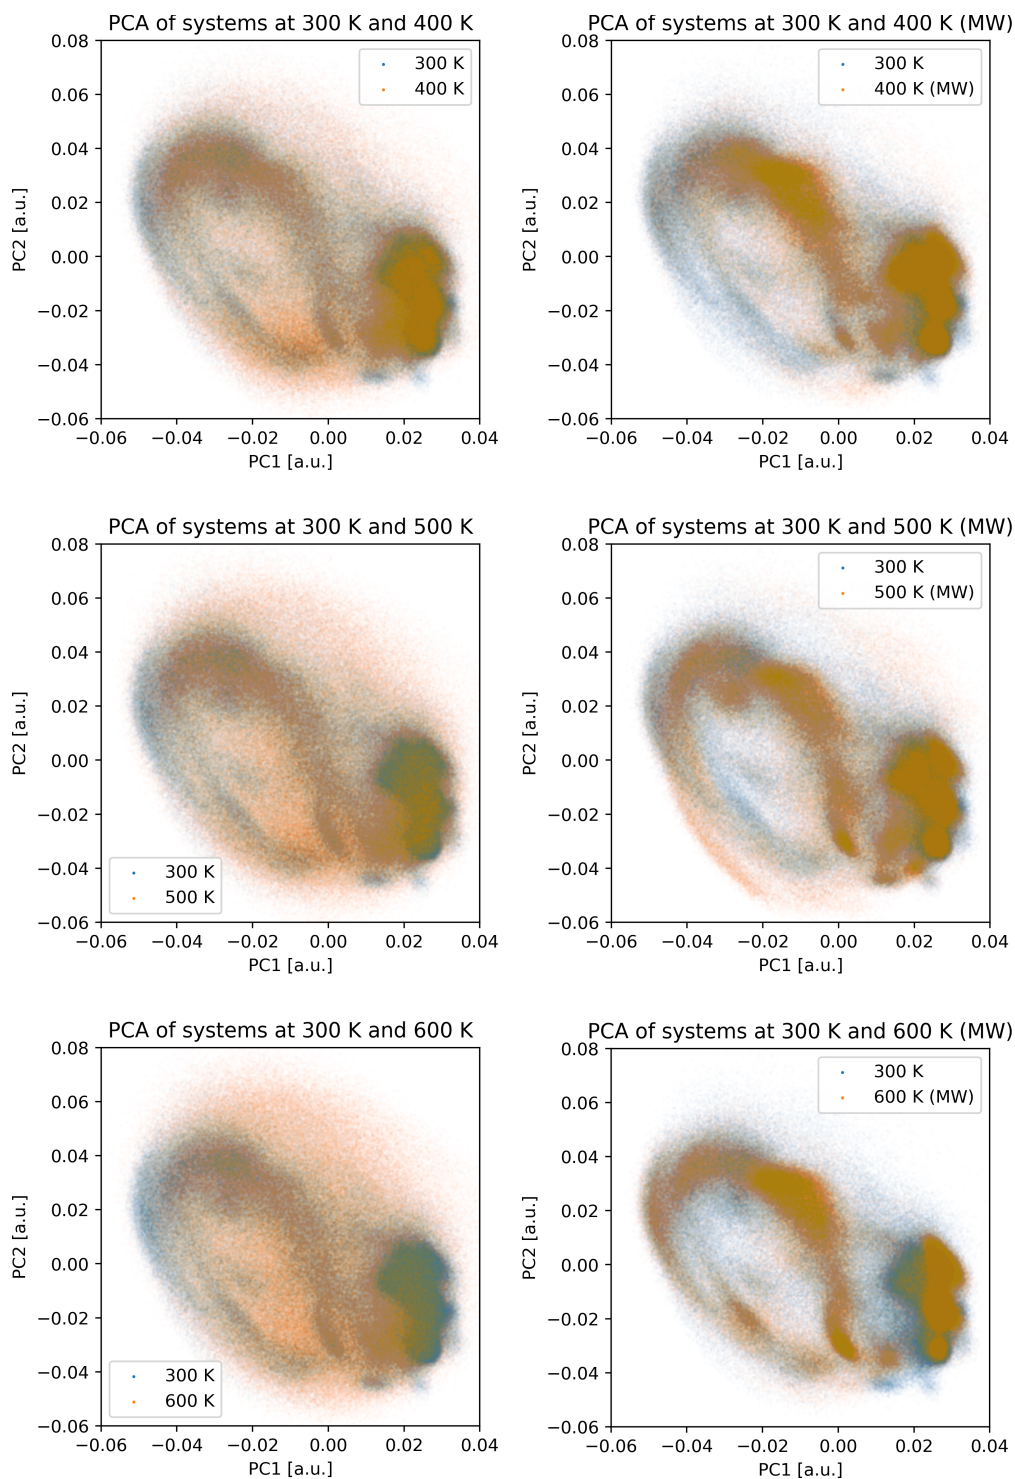

Figure S6: Principal component analysis of the combined clustering of systems at equilibrium temperature of 300 K, conventionally and MW heated up to 400 K (top row), 500 K (middle row) and 600 K (bottom row). The first and second principal component form the x and y axis of the scatter plots, respectively. On each plot, the trajectory at equilibrium 300 K is depicted with blue dots and the trajectory at an elevated temperature is depicted with orange dots.

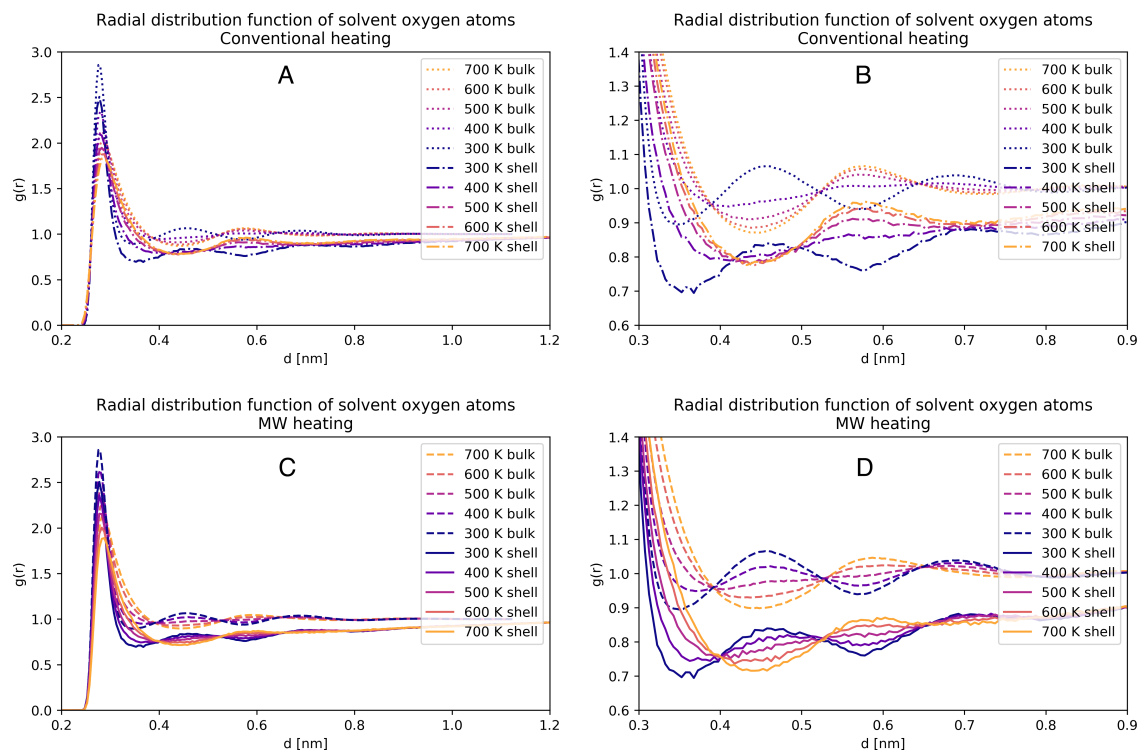

Figure S7: Radial distribution functions (RDFs) of the water oxygen atoms. A, B (top): Comparison of RDFs between the hydration shell and bulk water for the simulations of conventional heating. C, D (bottom): Comparison of RDFs between the hydration shell and bulk water for the simulations of MW heating.



# Tables

Table S1: Relative lifetimes of the most stable cluster

| $T_T / T_R$ <sup>a</sup> [K] | rel. lifetime [%] <sup>b</sup> |
|------------------------------|--------------------------------|
| 700 / 700                    | 1.1                            |
| 600 / 600                    | 2.1                            |
| 500 / 500                    | 4.6                            |
| 400 / 400                    | 9.6                            |
| 300 / 300                    | 20.6                           |
| 300 / 400                    | 19.1                           |
| 300 / 500                    | 17.7                           |
| 300 / 600                    | 32.0                           |
| 300 / 700                    | 29.7                           |

<sup>a</sup> Translational ( $T_T$ ) and rotational ( $T_R$ ) temperature of the solvent during MD simulation.

<sup>b</sup> Relative lifetime of the most stable cluster, calculated as the ratio of the number of cluster members to the total number of trajectory snapshots.

Table S2: Relative occurrences of peptide intramolecular hydrogen bonds

| donor residue | acceptor residue | relative occurrence [%] <sup>a</sup> | helix-forming |
|---------------|------------------|--------------------------------------|---------------|
| Cluster 1     |                  |                                      |               |
| 1             | 3                | 6.9                                  | *             |
| 2             | 4                | 55.6                                 | *             |
| 3             | 5                | 86.1                                 | *             |
| 4             | 6                | 40.4                                 | *             |
| 4             | 7                | 31.5                                 |               |
| 5             | 7                | 20.9                                 | *             |
| Cluster 2     |                  |                                      |               |
| 1             | 3                | 13.2                                 | *             |
| 1             | 4                | 8.2                                  |               |
| 4             | 5                | 5.1                                  |               |
| 4             | 6                | 64.9                                 | *             |
| 4             | 7                | 9.9                                  |               |
| 5             | 7                | 42.6                                 | *             |
| Cluster 3     |                  |                                      |               |
| 1             | 6                | 8.1                                  | *             |
| 3             | 1                | 5.1                                  |               |
| 3             | 6                | 10.3                                 |               |
| 3             | 7                | 20.7                                 |               |
| 4             | 6                | 6.6                                  |               |
| 4             | 6                | 70.7                                 |               |
| Cluster 4     |                  |                                      |               |
| 1             | 3                | 13.5                                 | *             |
| 1             | 4                | 29.2                                 |               |
| 1             | 5                | 36.7                                 |               |
| 2             | 5                | 5.9                                  |               |
| 2             | 6                | 19.3                                 |               |
| 3             | 6                | 61.3                                 |               |
| 3             | 7                | 6.8                                  |               |
| 4             | 7                | 5.7                                  |               |
| Cluster 5     |                  |                                      |               |
| 1             | 3                | 58.8                                 | *             |
| 4             | 5                | 55.6                                 |               |

<sup>a</sup> Calculated as a ratio between the snapshots containing the particular hydrogen bond and the total number of snapshots. Only the hydrogen bonds present in at least 5% of the snapshots are reported.

## References

- (1) Eichenberger, A. P.; Allison, J. R.; Dolenc, J.; Geerke, D. P.; Horta, B. A.; Meier, K.; Oostenbrink, C.; Schmid, N.; Steiner, D.; Wang, D.; Van Gunsteren, W. F. GROMOS++ software for the analysis of biomolecular simulation trajectories. *J. Chem. Theory Comput.* **2011**, *7*, 3379–3390.
